# Supplementary material for: Near-monodispersed polyaniline particles through template synthesis and simultaneous doping with diblock copolymers of PMA and PAAMPSA
Source: Royal Society of Chemistry journal article supplement (doi:10.1039/b810849h), 2008-01-01
Supplement: b810849h.pdf [file b810849h.pdf]

Supplementary Material (ESI) for Journal of Materials Chemistry  
This journal is © The Royal Society of Chemistry 2008

**Near-Monodispersed Polyaniline Particles through Template  
Synthesis and Simultaneous Doping with Diblock Copolymers  
of PMA and PAAMPSA**

Tracy Bucholz, Yangming Sun and Yueh-Lin Loo

**Supporting Information**

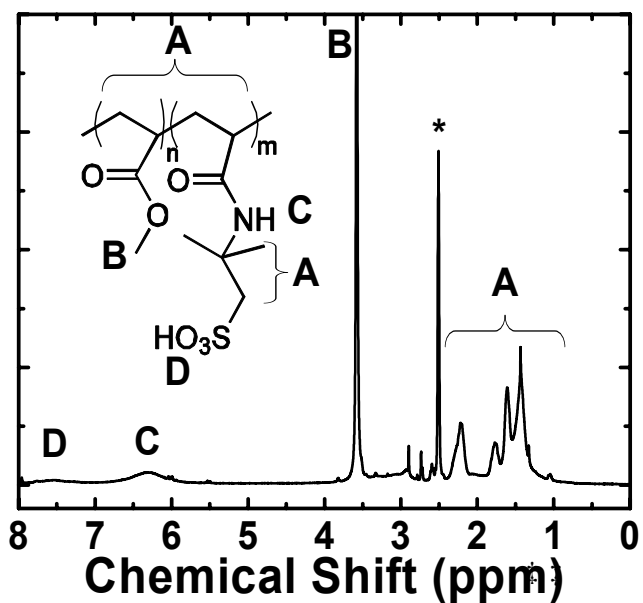

**Fig. S1:**  $^1\text{H}$  NMR spectrum of PMA/PAAMPSA 10/11 in deuterated DMSO. The proton contributions have been labeled for clarity. The asterisk denotes the d-DMSO solvent peak. The two small peaks at 2.8 and 2.9 ppm are residual DMF from PAAMPSA synthesis. The chemical structure of PMA/PAAMPSA is provided in the inset for reference.

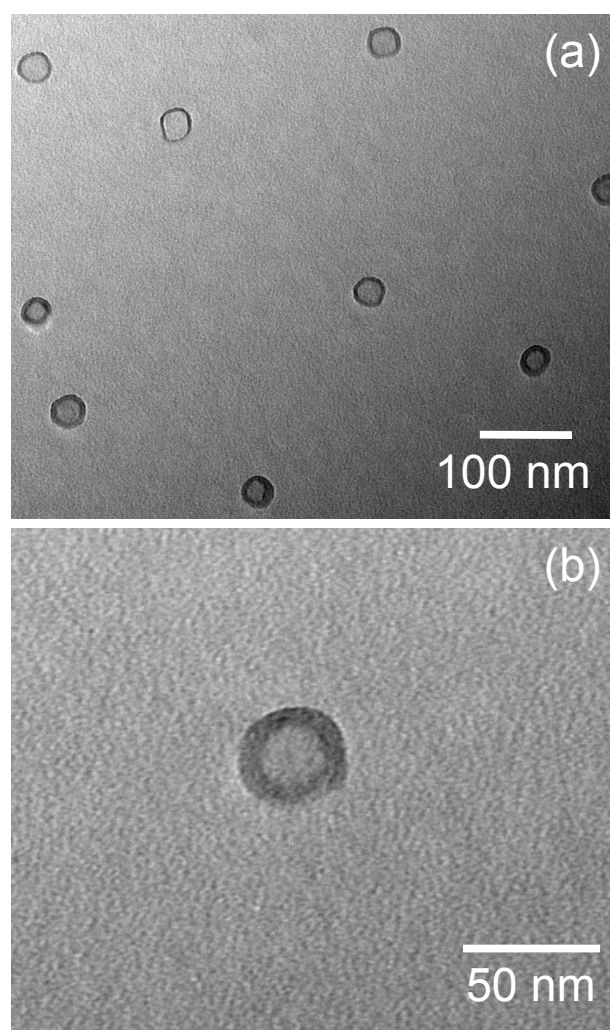

**Fig. S2:** Transmission electron micrographs of PMA/PAAMPSA 10/11 in 0.2M NaCl (a) at low magnification, showing multiple micelles, and (b) at higher magnification, showing the core/shell-structure of these micelles.

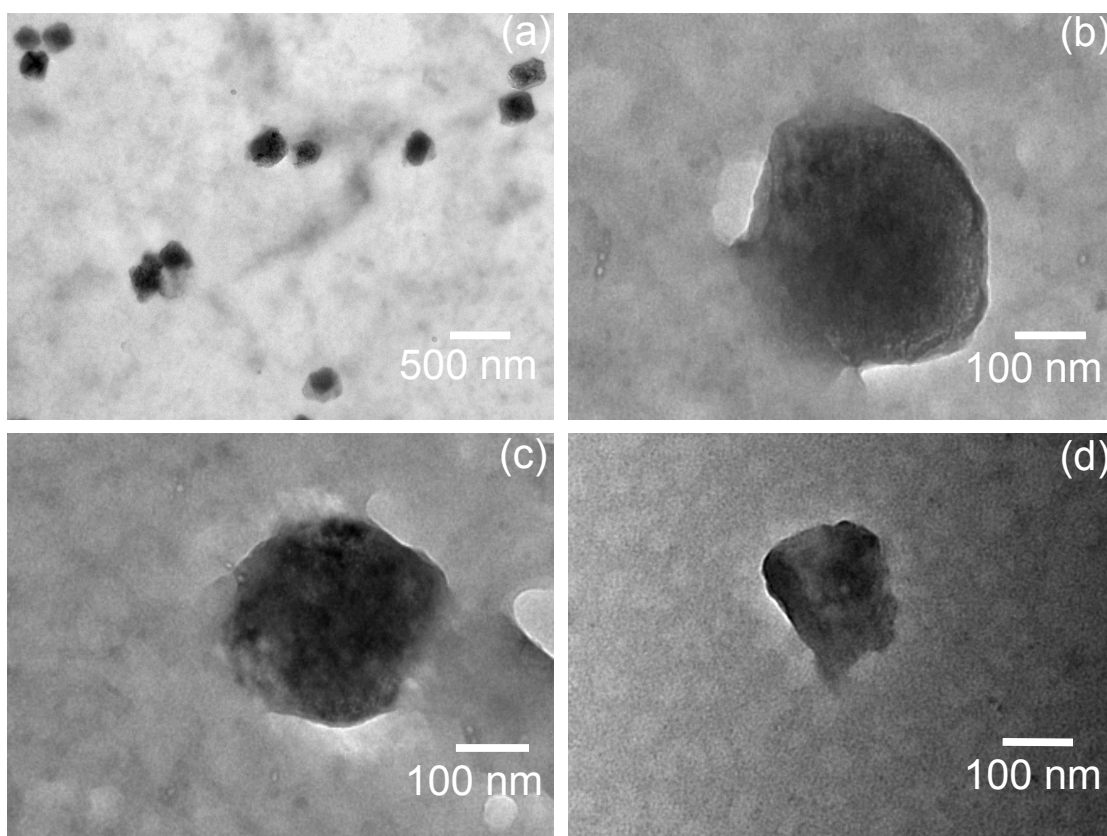

**Fig. S3:** Transmission electron micrographs of PANI-PMA/PAAMPSA 10/23 (a) at low magnification, showing multiple nanoparticles, and of (b) PANI-PMA/PAAMPSA 10/23, (c) PANI-PMA/PAAMPSA 10/11, and (d) PANI-PMA/PAAMPSA 10/6 at the same higher magnification.

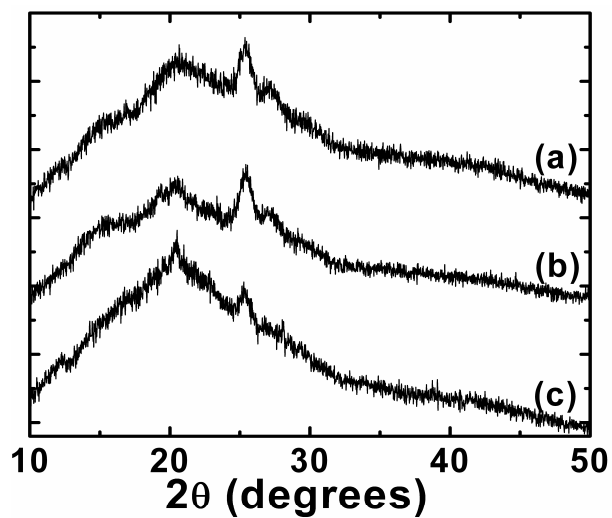

**Fig. S4:** XRD spectra of (a) PANI-PMA/PAAMPSA 10/23, (b) PANI-PMA/PAAMPSA 10/11, and (c) PANI-PMA/PAAMPSA 10/6. The spectra have been shifted along the y-axis for clarity.

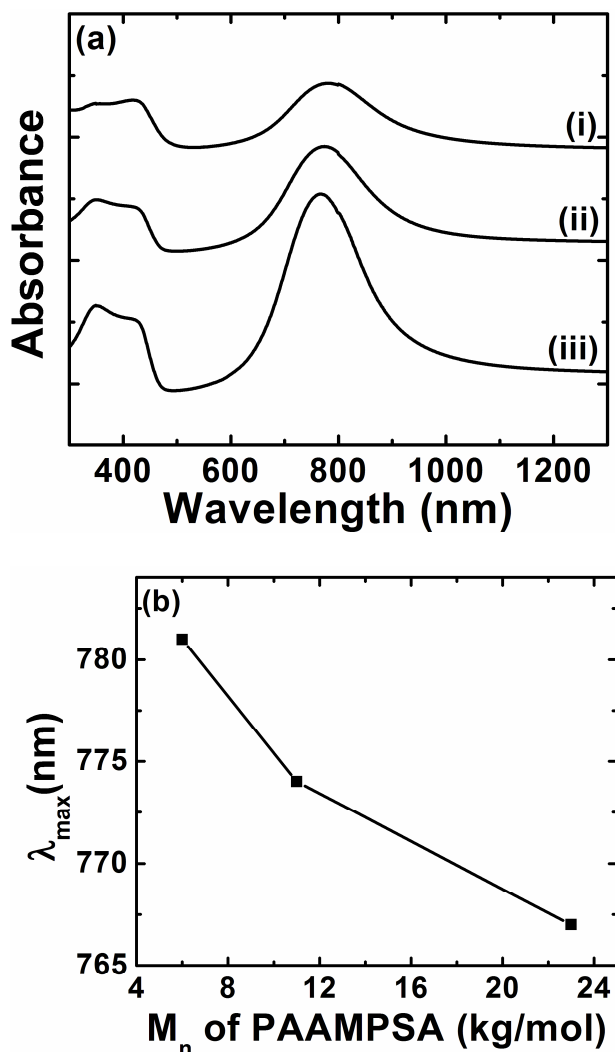

**Fig. S5:** (a) UV-vis-NIR spectra of (i) PANI-PMA/PAAMPSA 10/6, (ii) PANI-PMA/PAAMPSA 10/11, and (iii) PANI-PMA/PAAMPSA 10/23. The spectra have been shifted along the y-axis for clarity. The location of the peak maximum,  $\lambda_{\max}$ , of each spectrum is quantified in (b).
